# Supplementary material
Source: PubMed Central journal article supplement (PMC3138287)
Supplement: supp_M111.241893_jbc.M111.241893-1.pdf [file supp_M111.241893_jbc.M111.241893-1.pdf]

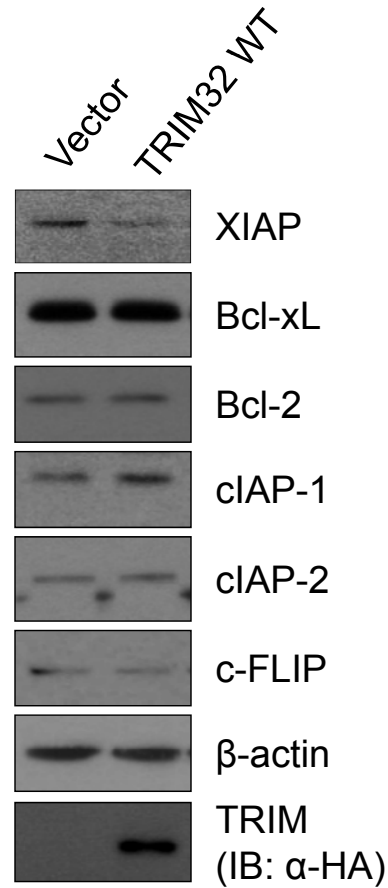

Figure S1. TRIM32 induces degradation of XIAP in C2C12 cells. Vectors encoding full-length TRIM32 or control vector were transfected into C2C12 cells and the transfected cells were selected with 1mg/ml G418. The amounts of endogenous XIAP, Bcl-xL, Bcl-2, c-IAP-1, c-IAP-2 and c-FLIP proteins were analyzed by immunoblotting with their specific antibodies.  $\beta$ -actin was monitored as a loading control.
