# Supplementary material
Source: PubMed Central journal article supplement (PMC3138287)
Supplement: supp_M111.241893_jbc.M111.241893-2.pdf [file supp_M111.241893_jbc.M111.241893-2.pdf]

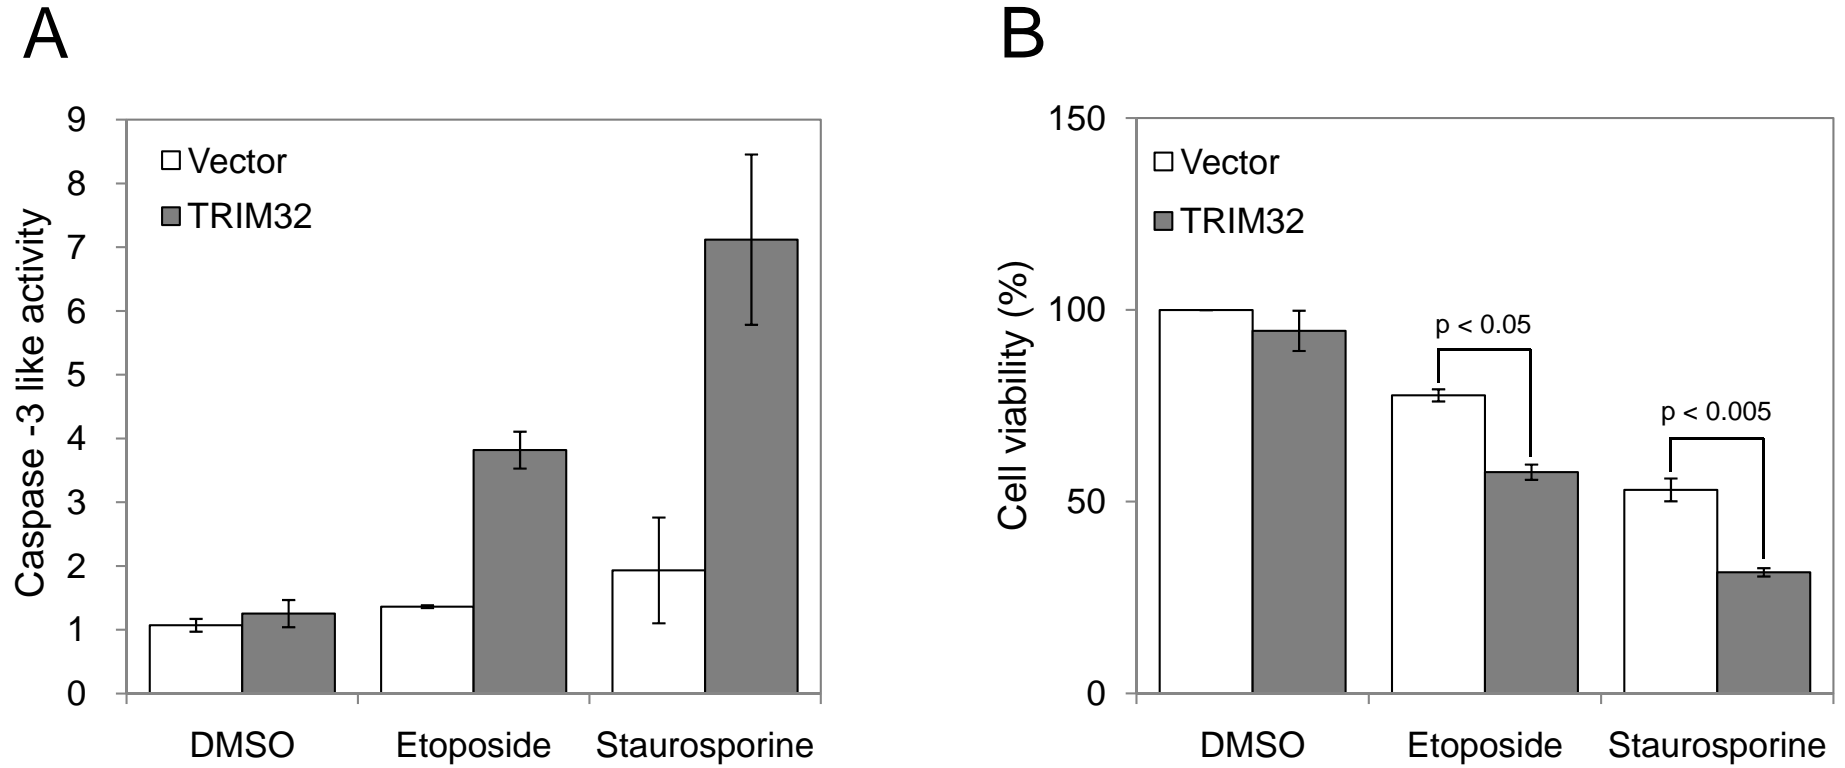

Figure S2. TRIM32 sensitizes cells to apoptosis induced by intrinsic pathway. A. HEK293T cells were transiently transfected with the vector encoding HA-tagged TRIM32 or the control vector. After 24 h, cells were treated with etoposide and staurosporine for 12 h. Activity of caspase-3 was measured. B. HeLa cells were transiently transfected with the vector encoding HA-tagged TRIM32 or the control vector. At 24 h after transfection, cells were seeded into 96 well plate and cultured for 12 h. Then, cells were treated with etoposide and staurosporine for 36 h and 48 h, respectively. Cell viability was determined by CCK8 assay.
